# Supplementary material for: RFX1–dependent activation of SHP-1 induces autophagy by a novel obatoclax derivative in hepatocellular carcinoma cells
Source: PubMed Central journal article supplement (PMC4148109; doi:10.18632/oncotarget.2054), 2014-06-03
Supplement: oncotarget-05-4909-s001.pdf [file oncotarget-05-4909-s001.pdf]

## RFX1-dependent activation of SHP-1 induces autophagy by a novel obatoclax derivative in Hepatocellular carcinoma cells

### Supplementary Material

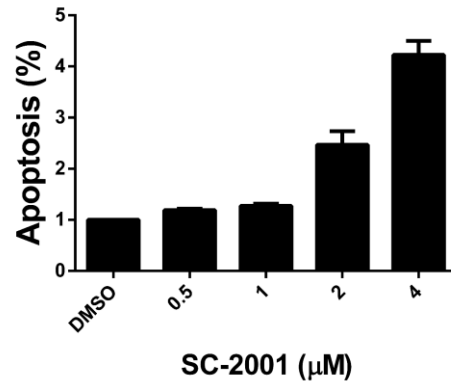

**Supplementary figure 1: SC-2001 induced apoptosis of PLC5 cells.** PLC5 cells were exposed to different concentration of SC-2001 for 48 h. After that, TUNEL assay were subjected to analyze the apoptotic effect of SC-2001.

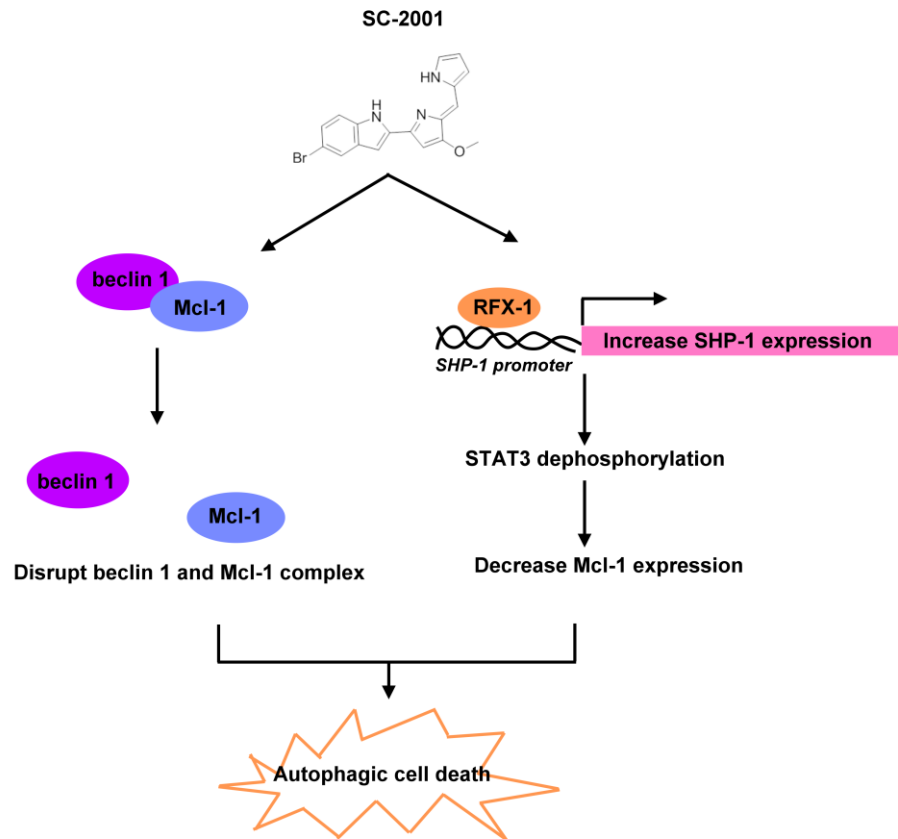

**Supplementary figure 2: The model of SC-2001-induced autophagic cell death.**
